# Supplementary material for: The Chlamydia trachomatis Inc Tri1 interacts with TRAF7 to displace native TRAF7 interacting partners
Source: PubMed Central journal article supplement (PMC11218536; doi:10.1128/spectrum.00453-24), 2024-05-30
Supplement: reviewer-comments.pdf [file reviewer-comments.pdf]

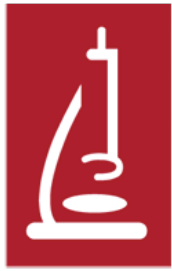

AMERICAN  
SOCIETY FOR  
MICROBIOLOGY

# Microbiology Spectrum

## The *Chlamydia trachomatis* Inc Tri1 interacts with TRAF7 to displace native TRAF7 interacting partners

Clara Herrera, Eleanor McMahon, Danielle Swaney, Jessica Sherry, Khavong Pha, Kathleen Boone-Adams, Jeffrey Johnson, Nevan Krogan, Meredith Stevers, David Solomon, Cherilyn Elwell, and Joanne Engel

*Corresponding Author(s): Joanne Engel, University of California, San Francisco*

---

### Review Timeline:

|                     |                   |
|---------------------|-------------------|
| Submission Date:    | February 26, 2024 |
| Editorial Decision: | March 19, 2024    |
| Revision Received:  | April 23, 2024    |
| Accepted:           | April 23, 2024    |

---

*Editor: Brian Conlon*

*Reviewer(s): The reviewers have opted to remain anonymous.*

### Transaction Report:

(Note: With the exception of the correction of typographical or spelling errors that could be a source of ambiguity, letters and reports are not edited. The original formatting of letters and referee reports may not be reflected in this compilation.)

**DOI:** <https://doi.org/10.1128/spectrum.00453-24>

Re: Spectrum00453-24 (The *Chlamydia trachomatis* Inc Tri1 interacts with TRAF7 to displace native TRAF7 interacting partners)

Dear Dr. Joanne Engel:

Thank you for the privilege of reviewing your work. Below you will find my comments, instructions from the Spectrum editorial office, and the reviewer comments.

Reviewer 2 has some minor comments that can likely be easily addressed with some minor edits/additions to the text.

Please return the manuscript within 60 days; if you cannot complete the modification within this time period, please contact me. If you do not wish to modify the manuscript and prefer to submit it to another journal, notify me immediately so that the manuscript may be formally withdrawn from consideration by Spectrum.

### Revision Guidelines

To submit your modified manuscript, log into the submission site at <https://spectrum.msubmit.net/cgi-bin/main.plex>. Go to Author Tasks and click the appropriate manuscript title to begin. The information you entered when you first submitted the paper will be displayed; update this as necessary. Note the following requirements:

- Upload point-by-point responses to the issues raised by the reviewers in a file named "Response to Reviewers," NOT IN YOUR COVER LETTER
- Upload a compare copy of the manuscript (without figures) as a "Marked-Up Manuscript" file
- Upload a clean .DOC/.DOCX version of the revised manuscript and remove the previous version
- Each figure must be uploaded as a separate, editable, high-resolution file (TIFF or EPS preferred), and any multipanel figures must be assembled into one file
- Any [supplemental material](#) intended for posting by ASM should be uploaded separate from the main manuscript; you can combine all supplemental material into one file (preferred) or split it into a maximum of 10 files, with all associated legends included

For complete guidelines on revision requirements, see our [Submission and Review Process](#) webpage. Submission of a paper that does not conform to guidelines may delay acceptance of your manuscript.

**Data availability:** ASM policy requires that data be available to the public upon online posting of the article, so please verify all links to sequence records, if present, and make sure that each number retrieves the full record of the data. If a new accession number is not linked or a link is broken, provide Spectrum production staff with the correct URL for the record. If the accession numbers for new data are not publicly accessible before the expected online posting of the article, publication may be delayed; please contact production staff ([Spectrum@asmusa.org](mailto:Spectrum@asmusa.org)) immediately with the expected release date.

**Publication Fees:** For information on publication fees and which article types are subject to charges, visit our [website](#). If your manuscript is accepted for publication and any fees apply, you will be contacted separately about payment during the production process; please follow the instructions in that e-mail. Arrangements for payment must be made before your article is published.

**ASM Membership:** Corresponding authors may [join or renew ASM membership](#) to obtain discounts on publication fees. Need to upgrade your membership level? Please contact Customer Service at [Service@asmusa.org](mailto:Service@asmusa.org).

The ASM Journals program strives for constant improvement in our submission and publication process. Please tell us how we can improve your experience by taking this quick [Author Survey](#).

Thank you for submitting your paper to Spectrum.

Sincerely,  
Brian Conlon  
Editor  
Microbiology Spectrum

Reviewer #1 (Comments for the Author):

This is a highly detailed and very polished manuscript that describes the authors' identification of TRAF7, a human ubiquitin ligase, as an interaction partner of the chlamydial Inc protein, Tri1. They demonstrate the specificity of the association between the proteins at the inclusion membrane during infection and map the relevant interaction sub-domains. The analysis is robust, appropriately controlled and validated with complementary approaches, lending high confidence in the strength and specificity of

the interaction during cellular infection. Although the specific role that TRAF7 engagement by Tri1 may play was not identified, their findings point to engagement of JNK-AP1 signaling with implications for modulation of innate inflammation, a key feature of chlamydial pathogenesis.

Reviewer #2 (Comments for the Author):

An interaction between the *C. trachomatis* inclusion membrane protein CT224 and host TRAF7 was identified in a previous study using an affinity-purification-mass spectroscopy screen. Herrera, et al confirm the interaction herein and perform a basic characterization of the protein-protein interaction. The authors find evidence for domain-specific interactions and designate CT224 as Tri1 (TRAF7 interactor 1). Based on their findings that a Tri1 coil-coil domain interacts with the TRAF7 WD40 domain to prevent TRAF7 interaction with signal transduction kinases, the authors speculate that this could impact immune signaling within infected cells. Novel findings include recruitment of TRAF7 to the chlamydial inclusion, elucidation of interaction domains, and impact of MEKK2/3 binding to TRAF7. This doesn't move the needle very far forward and the biological relevance of the interaction remains unaddressed. Having said that, the experiments/data being presented are solid and support the author's conclusions.

1. I wonder if the designation of CT224 as Tri1 is a bit too broad. I don't have any good alternatives, but there are multiple TRAFs. CT224 seems to interact only with TRAF7. To base the name on the root "TRAF interactor" doesn't seem very specific.
2. Line 94-95 states that TRAF7 is involved in pathways relevant to chlamydial infection. There is no reference provided. Is this speculation or is there experimental evidence supporting this statement? The point is addressed in the discussion, but it might be helpful for some context in the introduction.
3. Was mutagenesis of Tri1 attempted? It would be helpful to know if the gene might be essential if attempts were not successful.
4. There is precedent for the model being described here (Interaction of a host protein with an Inc resulting in interference with signal transduction). *C. pneumoniae* expresses an Inc that interferes with IL-17 signaling by sequestering a signal transduction protein (Act1) at the inclusion membrane (PMID: 19159390). This should probably be mentioned in the discussion to bolster the author's speculation.

We thank the reviewers for their positive and helpful comments and have addressed each of reviewer 2's suggestions and questions.

1. I wonder if the designation of CT224 as Tri1 is a bit too broad. I don't have any good alternatives, but there are multiple TRAFs. CT224 seems to interact only with TRAF7. To base the name on the root "TRAF interactor" doesn't seem very specific.

*We appreciate that the effector name Tri1 does not specifically encompass that it interacts specifically with TRAF7 as opposed to the other TRAFs, but we also were unable to come up with a name encapsulated this subtlety.*

2. Line 94-95 states that TRAF7 is involved in pathways relevant to chlamydial infection. There is no reference provided. Is this speculation or is there experimental evidence supporting this statement? The point is addressed in the discussion, but it might be helpful for some context in the introduction.

*We have added in the appropriate references.*

3. Was mutagenesis of Tri1 attempted? It would be helpful to know if the gene might be essential if attempts were not successful.

For the reviewer's information, we spent several years trying to make a Tri1 mutant. Using FRAEM, we were able to reproducibly get integration of the allelic exchange plasmid into the chromosome (ie, meridioids which exhibited both mCherry and GFP markers and were ampicillin resistant) but were never able to recover recombinants in which the integrated plasmid had recombined to leave mCherry and Ampicillin interrupting the Tri1 locus. As a control, in experiments performed at the same time, we could easily recovery strains in which an IncE allelic exchange plasmid successfully recombined into and then out of the native IncE locus. More recently, Ouellette and co-workers have reported successfully using Crispr1 to generate a strain of L2 in which Tri1 mRNA can be depleted. They generously shared this strain with our lab. Their studies, which are posted on BioRxiv ([www.biorxiv.org/content/10.1101/2023.10.17.562819v1.full.pdf](http://www.biorxiv.org/content/10.1101/2023.10.17.562819v1.full.pdf)), and our unpublished studies, have failed to reveal any changes in the ability of this Tri1 depleted strain to propagate in cell culture. We are continuing to characterize this depletion strain and hope that it will be the focus of a future paper.

4. There is precedent for the model being described here (Interaction of a host protein with an Inc resulting in interference with signal transduction). *C. pneumoniae* expresses an Inc that interferes with IL-17 signaling by sequestering a signal transduction protein (Act1) at the inclusion membrane (PMID: 19159390). This should probably be mentioned in the discussion to bolster the author's speculation.

*We thank the reviewer for bringing this paper to our attention and have added in a sentence and reference as suggested. "There is a precedent for inhibition of immune signaling in another human-adapted Chlamydia species, C. pneumoniae. Here, the Inc CP036 binds to and redirects the Interleukin 17A receptor-binding protein Act1 to the inclusion, modulating Interleukin 17A signaling."*

Re: Spectrum00453-24R1 (The *Chlamydia trachomatis* Inc Tri1 interacts with TRAF7 to displace native TRAF7 interacting partners)

Dear Dr. Joanne Engel:

Your manuscript has been accepted, and I am forwarding it to the ASM production staff for publication. Your paper will first be checked to make sure all elements meet the technical requirements. ASM staff will contact you if anything needs to be revised before copyediting and production can begin. Otherwise, you will be notified when your proofs are ready to be viewed.

**Data Availability:** ASM policy requires that data be available to the public upon online posting of the article, so please verify all links to sequence records, if present, and make sure that each number retrieves the full record of the data. If a new accession number is not linked or a link is broken, provide production staff with the correct URL for the record. If the accession numbers for new data are not publicly accessible before the expected online posting of the article, publication may be delayed; please contact ASM production staff immediately with the expected release date.

**Publication Fees:** For information on publication fees and which article types have charges, please visit our [website](#). We have partnered with Copyright Clearance Center (CCC) to collect author charges. If fees apply to your paper, you will receive a message from no-reply@copyright.com with further instructions. For questions related to paying charges through RightsLink, please contact CCC at ASM\_Support@copyright.com or toll free at +1-877-622-5543. CCC makes every attempt to respond to all emails within 24 hours.

**ASM Membership:** Corresponding authors may [join or renew ASM membership](#) to obtain discounts on publication fees. Need to upgrade your membership level? Please contact Customer Service at [Service@asmusa.org](mailto:Service@asmusa.org).

**PubMed Central:** ASM deposits all Spectrum articles in PubMed Central and international PubMed Central-like repositories immediately after publication. Thus, your article is automatically in compliance with the NIH access mandate. If your work was supported by a funding agency that has public access requirements like those of the NIH (e.g., the Wellcome Trust), you may post your article in a similar public access site, but we ask that you specify that the release date be no earlier than the date of publication on the Spectrum website.

**Embargo Policy:** A press release may be issued as soon as the manuscript is posted on the [Spectrum Latest Articles webpage](#). The corresponding author will receive an email with the subject line "ASM Journals Author Services Notification" when the article is available online.

The ASM Journals program strives for constant improvement in our submission and publication process. Please tell us how we can improve your experience by taking this quick [Author Survey](#).

Thank you for submitting your paper to Spectrum.

Sincerely,  
Brian Conlon  
Editor  
Microbiology Spectrum
